# Supplementary material
Source: PubMed Central journal article supplement (PMC3006248)
Supplement: supp_00239.2010_tableS1.pdf [file supp_00239.2010_tableS1.pdf]

**1Supplemental Table 1: qRT-PCR Primer Sequences**

| <b>Gene</b>  | <b>Forward 5'-3'</b>    | <b>Reverse 5'-3'</b>   | <b>Product (bp)</b> |
|--------------|-------------------------|------------------------|---------------------|
| CgA          | AAGAAGAGGAGGAGGAAGAGG   | TCCATCCACTGCCTGAGAG    | 149                 |
| EGF          | CCTGCCCCCTTCCTAGTTTTTC  | CTCCGTTCTGTTGGTCTACCC  | 286                 |
| Gastrin      | GGACCAGGGACCAATGAGG     | CCAAAGTCCATCCATCCGTAGG | 173                 |
| HDC          | CGACTAAGAAGCCCTGTTGAC   | TCACGGTATTACGGTATTACAC | 109                 |
| H,K $\alpha$ | TGTACACATGAGAGTCCCCTTG  | GAGTCTTCTCGTTTTCCACACC | 157                 |
| IF           | CTTGGCCCTGACCTGTATGT    | TAGGTTGCTCAGGTGTCACG   | 191                 |
| Muc5AC       | GCCGTGTCCAGGAGTCTAATACC | CAGCCTAGCCACCACCTTCAG  | 133                 |
